# Supplementary material
Source: Elsevier journal article supplement (https://comptes-rendus.academie-sciences.fr/biologies/article/10.1016/j.crvi.2010.10.005/file/attach/mmc1.pdf)
Supplement: mmc1 [file mmc1.pdf]

Annexe 1. Espèces recensées dans les aulnaies de Numidie algérienne. Les codes ne sont donnés que pour les espèces représentées Figures 2 et 3.

Appendix 1. Species noted in alder forests of Algerian Numidia. Codes are given only for species represented Figures 2 and 3.

| Code | Espèce                                                                     | Famille          | Synonymes principaux                                        |
|------|----------------------------------------------------------------------------|------------------|-------------------------------------------------------------|
|      | <i>Acacia melanoxylon</i> R.Br.                                            | Mimosoideae      |                                                             |
| Acde | <i>Acacia dealbata</i> Link                                                | Mimosoideae      |                                                             |
| Acmo | <i>Acanthus mollis</i> L.                                                  | Acanthaceae      |                                                             |
|      | <i>Adiantum capillus-veneris</i> L.                                        | Adiantaceae      |                                                             |
| Agst | <i>Agrostis stolonifera</i> L.                                             | Poaceae          |                                                             |
|      | <i>Aira cupaniana</i> Guss.                                                | Poaceae          | <i>A. uniaristata</i>                                       |
| Alpa | <i>Alisma plantago-aquatica</i> L.                                         | Alismataceae     | <i>A. plantago</i>                                          |
| Alpe | <i>Alliaria petiolata</i> (M.Bieb.) Cavara & Grande                        | Brassicaceae     | <i>A. officinalis</i> , <i>Sisymbrium alliaria</i>          |
|      | <i>Allium triquetrum</i> L.                                                | Alliaceae        |                                                             |
| Algl | <i>Alnus glutinosa</i> (L.) Gaertn.                                        | Betulaceae       | <i>A. morisiana</i>                                         |
| Albu | <i>Alopecurus bulbosus</i> Gouan                                           | Poaceae          |                                                             |
| Alse | <i>Althernanthera sessilis</i> (L.) DC.                                    | Amaranthaceae    | <i>A. repens</i> , <i>Gomphrena sessilis</i>                |
|      | <i>Amaranthus graecizans</i> L.<br>subsp. <i>silvestris</i> (Vill.) Brenan | Amaranthaceae    | <i>A. angustifolius</i> subsp. <i>silvestris</i>            |
|      | <i>Ampelodesmos mauritanicus</i> (Poir.) T.Durand & Schinz                 | Poaceae          | <i>A. tenax</i> , <i>Arundo mauritanica</i>                 |
| Anar | <i>Anagallis arvensis</i> L.                                               | Primulaceae      |                                                             |
| Ancr | <i>Anagallis crassifolia</i> Thore                                         | Primulaceae      |                                                             |
|      | <i>Anagallis monelli</i> L.                                                | Primulaceae      | <i>A. monelli</i> subsp. <i>collina</i> , <i>A. collina</i> |
|      | <i>Anogramma leptophylla</i> (L.) Link                                     | Pteridaceae      | <i>Gymnogramma leptophylla</i>                              |
|      | <i>Anthemis arvensis</i> L.                                                | Asteraceae       | <i>A. ubensis</i>                                           |
| Anod | <i>Anthoxanthum odoratum</i> L.                                            | Poaceae          |                                                             |
|      | <i>Arisarum vulgare</i> Targ. Tozz.                                        | Araceae          | <i>Arum arisarum</i>                                        |
|      | <i>Aristolochia paucinervis</i> Pomel                                      | Aristolochiaceae | <i>A. longa</i> subsp. <i>paucinervis</i>                   |
| Arit | <i>Arum italicum</i> Mill.                                                 | Araceae          |                                                             |
|      | <i>Arundo donax</i> L.                                                     | Poaceae          | <i>Donax arundinaceus</i>                                   |
| Asac | <i>Asparagus acutifolius</i> L.                                            | Asparagaceae     | <i>A. nervosus</i> , <i>A. morisianus</i>                   |
| Asae | <i>Asphodelus aestivus</i> Brot.                                           | Asphodelaceae    | <i>A. ramosus</i> , <i>A. microcarpus</i>                   |
| Asan | <i>Asplenium adiantum-nigrum</i> L.                                        | Aspleniaceae     |                                                             |
|      | <i>Asplenium scolopendrium</i> L.                                          | Aspleniaceae     | <i>Phyllitis scolopendrium</i>                              |
|      | <i>Asplenium trichomanes</i> L.<br>subsp. <i>quadrivalens</i> D.E.Meyer    | Aspleniaceae     |                                                             |
|      | <i>Aster squamatus</i> (Speng.) Hieron                                     | Asteraceae       |                                                             |
|      | <i>Astragalus lusitanicus</i> Lam.                                         | Fabaceae         |                                                             |
|      | <i>Astragalus pelecinus</i> (L.) Barbeneby                                 | Fabaceae         | <i>Biserrula pelecinus</i>                                  |
| Atff | <i>Athyrium filix-femina</i> (L.) Roth.                                    | Woodsiaceae      | <i>Polypodium filix-femina</i>                              |
|      | <i>Avena sterilis</i> L.                                                   | Poaceae          |                                                             |
| Bara | <i>Baldellia ranunculoides</i> (L.) Parl.                                  | Alismataceae     | <i>Echinodorus ranunculoides</i>                            |
| Betr | <i>Bellardia trixago</i> (L.) All.                                         | Scrophulariaceae | <i>Bartsia trixago</i> , <i>Trixago apula</i>               |
| Bean | <i>Bellis annua</i> L.                                                     | Asteraceae       |                                                             |
| Bepr | <i>Bellis prostrata</i> Pomel                                              | Asteraceae       | <i>B. radicans</i> , <i>B. repens</i>                       |
| Bidi | <i>Biscutella didyma</i> L.                                                | Brassicaceae     |                                                             |
|      | <i>Borago longifolia</i> Poir.                                             | Boraginaceae     |                                                             |
|      | <i>Borago officinalis</i> L.                                               | Boraginaceae     |                                                             |
|      | <i>Brachypodium distachyum</i> (L.) P.Beauv.                               | Poaceae          | <i>Bromus distachyus</i>                                    |
|      | <i>Brachypodium sylvaticum</i> (Huds) P.Beauv.                             | Poaceae          | <i>Festuca sylvatica</i>                                    |

| Code | Espèce                                         | Famille          | Synonymes principaux                              |
|------|------------------------------------------------|------------------|---------------------------------------------------|
|      | <i>Brassica procumbens</i> (Poir.) Schultz     | Brassicaceae     | <i>Sinapis procumbens</i>                         |
|      | <i>Briza maxima</i> L.                         | Poaceae          |                                                   |
| Brmi | <i>Briza minor</i> L.                          | Poaceae          |                                                   |
|      | <i>Bromus sterilis</i> L.                      | Poaceae          |                                                   |
|      | <i>Bryonia cretica</i> L.                      | Cucurbitaceae    | <i>B. dioica</i> , <i>B. digyna</i>               |
|      | subsp. <i>dioica</i> (Jacq.) Tutin             |                  |                                                   |
| Cavi | <i>Calicotome villosa</i> (Poir.) Link.        | Fabaceae         | <i>C. cretica</i> , <i>Spartium villosum</i>      |
|      | <i>Callitriche obtusangula</i> Le Gall         | Callitrichaceae  | <i>C. palustris</i> subsp. <i>obtusangula</i>     |
| Case | <i>Calystegia sepium</i> (L.) R.Br.            | Convolvulaceae   | <i>Convolvulus sepium</i>                         |
|      | <i>Campanula alata</i> Desf.                   | Campanulaceae    |                                                   |
|      | <i>Campanula dichotoma</i> L.                  | Campanulaceae    | <i>C. dichotoma</i> subsp. <i>eu-dichotoma</i>    |
|      | <i>Campanula rapunculoides</i> L.              | Campanulaceae    | <i>C. elatior</i> , <i>C. verruculosa</i>         |
|      | <i>Capsella bursa-pastoris</i> (L.) Medik.     | Brassicaceae     |                                                   |
|      | <i>Cardamine hirsuta</i> L.                    | Brassicaceae     |                                                   |
|      | <i>Carduus numidicus</i> Dur.                  | Asteraceae       | <i>Carduus nutans</i> subsp. <i>numidicus</i>     |
|      | <i>Carex acutiformis</i> Ehrh.                 | Cyperaceae       | <i>C. paludosa</i>                                |
| Cadi | <i>Carex distans</i> L.                        | Cyperaceae       | <i>C. distans</i> subsp. <i>eu-distans</i>        |
|      | <i>Carex divisa</i> Huds.                      | Cyperaceae       | <i>C. divisa</i> subsp. <i>ammophila</i>          |
|      | subsp. <i>chaetophylla</i> (Steud.) Nyman      |                  |                                                   |
|      | <i>Carex divulsa</i> Stoks.                    | Cyperaceae       | <i>C. muricata</i> subsp. <i>divulsa</i>          |
| Cael | <i>Carex elata</i> All.                        | Cyperaceae       | <i>C. stricta</i>                                 |
|      | <i>Carex flacca</i> Shreb.                     | Cyperaceae       | <i>C. glauca</i>                                  |
| Capa | <i>Carex paniculata</i> L.                     | Cyperaceae       |                                                   |
| Cape | <i>Carex pendula</i> Huds.                     | Cyperaceae       | <i>C. maxima</i>                                  |
|      | <i>Carex pseudocyperus</i> L.                  | Cyperaceae       |                                                   |
| Capu | <i>Carex punctata</i> Gaudin                   | Cyperaceae       |                                                   |
| Care | <i>Carex remota</i> L.                         | Cyperaceae       |                                                   |
|      | <i>Carex sylvatica</i> Huds.                   | Cyperaceae       |                                                   |
|      | <i>Carex vulpina</i> L.                        | Cyperaceae       |                                                   |
|      | <i>Carlina racemosa</i> L.                     | Asteraceae       |                                                   |
|      | <i>Catapodium rigidum</i> (L.) C.E.Hubb.       | Poaceae          | <i>Desmazeria rigida</i> , <i>Scelopoa rigida</i> |
|      | subsp. <i>rigidum</i>                          |                  |                                                   |
| Ceca | <i>Centaurea calcitrapa</i> L.                 | Asteraceae       |                                                   |
|      | <i>Centaurea napifolia</i> L.                  | Asteraceae       |                                                   |
| Ceer | <i>Centaurium erythraea</i> Raf.               | Gentianaceae     | <i>C. umbellatum</i> subsp. <i>grandiflorum</i>   |
|      | subsp. <i>grandiflorum</i> (Pers.) Melderis    |                  |                                                   |
|      | <i>Cerastium glomeratum</i> Thuill.            | Caryophyllaceae  | <i>C. apetalum</i> , <i>C. viscosum</i>           |
|      | <i>Cerastium pentandrum</i> L.                 | Caryophyllaceae  | <i>C. semidecandrum</i> , <i>C. fallax</i>        |
|      | <i>Ceratophyllum demersum</i> L.               | Ceratophyllaceae |                                                   |
| Cema | <i>Cerinthe major</i> L.                       | Boraginaceae     |                                                   |
|      | <i>Chamaemelum mixtum</i> (L.) All.            | Asteraceae       | <i>Anthemis mixta</i> , <i>Ormenis mixta</i>      |
| Chhu | <i>Chamaerops humilis</i> L.                   | Palmae           |                                                   |
| Chal | <i>Chenopodium album</i> L.                    | Chenopodiaceae   |                                                   |
|      | <i>Circaea lutetiana</i> L.                    | Onagraceae       |                                                   |
|      | <i>Cistus monspeliensis</i> L.                 | Cistaceae        |                                                   |
| Cisa | <i>Cistus salvifolius</i> L.                   | Cistaceae        |                                                   |
| Clma | <i>Cladium mariscus</i> (L.) Pohl.             | Cyperaceae       | <i>Schoenus mariscus</i>                          |
| Clci | <i>Clematis cirrhosa</i> L.                    | Ranunculaceae    | <i>C. balearica</i> , <i>C. semitriloba</i>       |
| Clfl | <i>Clematis flammula</i> L.                    | Ranunculaceae    | <i>C. maritima</i>                                |
|      | <i>Clinopodium ascendens</i> (Jord.) Samp.     | Lamiaceae        | <i>Calamintha ascendens</i>                       |
| Comy | <i>Coleostephus myconis</i> (L.) Cass ex Rchb. | Asteraceae       | <i>Kremeria myconis</i>                           |
|      | <i>Colocasia antiquorum</i> Schott.            | Araceae          |                                                   |
|      | var. <i>typica</i> Engl.                       |                  |                                                   |
|      | <i>Convolvulus althaeoides</i> L.              | Convolvulaceae   |                                                   |
|      | <i>Convolvulus arvensis</i> L.                 | Convolvulaceae   |                                                   |
|      | <i>Conyza sumatrensis</i> (Retz.) E.Walker     | Asteraceae       | <i>C. altissima</i> , <i>Erigeron sumatrensis</i> |

| Code | Espèce                                                                       | Famille       | Synonymes principaux                                |
|------|------------------------------------------------------------------------------|---------------|-----------------------------------------------------|
| Coco | <i>Cotula coronopifolia</i> L.                                               | Asteraceae    |                                                     |
|      | <i>Crataegus azarolus</i> L.                                                 | Rosaceae      |                                                     |
| Crmo | <i>Crataegus monogyna</i> Jacq.                                              | Rosaceae      | <i>C. oxyacantha</i> subsp. <i>monogyna</i>         |
| Crve | <i>Crepis vesicaria</i> L.                                                   | Asteraceae    |                                                     |
| Cyaf | <i>Cyclamen africanum</i> Boiss. & Reut.                                     | Primulaceae   | <i>Cyclaminus africana</i>                          |
|      | <i>Cynodon dactylon</i> (L.) Pers.                                           | Poaceae       | <i>C. glabratus</i> , <i>Panicum dactylon</i>       |
|      | <i>Cynoglossum cheirifolium</i> L.                                           | Boraginaceae  |                                                     |
| Cypo | <i>Cynosurus elegans</i> Desf.                                               | Poaceae       | <i>C. aurasiacus</i>                                |
|      | <i>Cynosurus polybracteatus</i> Poir.                                        | Poaceae       | <i>C. cristatus</i> , <i>C. crista-galli</i>        |
|      | <i>Cyperus esculentus</i> L.                                                 | Cyperaceae    | <i>C. aureus</i>                                    |
| Cyfu | <i>Cyperus fuscus</i> L.                                                     | Cyperaceae    |                                                     |
| Cylo | <i>Cyperus longus</i> L.<br>subsp. <i>eu-longus</i> Asch & Gr.               | Cyperaceae    |                                                     |
| Cyvi | <i>Cytisus villosus</i> Pourr.                                               | Fabaceae      | <i>C. triflorus</i> , <i>C. hirsutus</i>            |
|      | <i>Dactyloctenium aegyptium</i> (L.) Willd.                                  | Poaceae       | <i>Cynosurus aegyptius</i>                          |
| Dagn | <i>Daphne gnidium</i> L.                                                     | Thymeleaceae  |                                                     |
|      | <i>Datura stramonium</i> L.                                                  | Solanaceae    |                                                     |
|      | <i>Daucus carota</i> L.<br>subsp. <i>maritimus</i> (Lam.) Batt.              | Apiaceae      | <i>D. parviflorus</i>                               |
|      | <i>Daucus carota</i> L.<br>subsp. <i>maximus</i> (Desf.) Ball.               | Apiaceae      | <i>D. maximus</i>                                   |
|      | <i>Daucus virgatus</i> (Poir.) Maire                                         | Apiaceae      | <i>Caucalis virgata</i> , <i>D. laserpitioides</i>  |
| Disa | <i>Digitaria sanguinalis</i> (L.) Scop.                                      | Poaceae       | <i>Panicum sanguinale</i>                           |
| Difu | <i>Dipsacus fullonum</i> L.                                                  | Dipsacaceae   | <i>D. sylvestris</i>                                |
| Digr | <i>Dittrichia graveolens</i> (L.) Greuter                                    | Asteraceae    | <i>Inula graveolens</i>                             |
| Drvi | <i>Dittrichia viscosa</i> (L.) Greuter                                       | Asteraceae    | <i>Erigeron viscosus</i> , <i>Inula viscosa</i>     |
| Dore | <i>Dorycnium rectum</i> (L.) Ser.                                            | Fabaceae      | <i>Bongeania recta</i> , <i>Lotus rectus</i>        |
| Drnu | <i>Drimia numidica</i> (Jord. & Fourr.) J.C.Manning & Goldblatt              | Hyacinthaceae | <i>Charybdis numidica</i> , <i>Squilla numidica</i> |
|      | <i>Echinochloa crus-galli</i> (L.) P.Beauv.                                  | Poaceae       | <i>Panicum crus-galli</i>                           |
|      | <i>Echinops spinosus</i> L.                                                  | Asteraceae    | .                                                   |
| Ecpl | <i>Echium plantagineum</i> L.                                                | Boraginaceae  |                                                     |
|      | <i>Eleocharis multicaulis</i> (Sm.) Desv.                                    | Cyperaceae    | <i>Scirpus multicaulis</i>                          |
| Elpa | <i>Eleocharis palustris</i> (L.) Roem. & Schult.                             | Cyperaceae    | <i>Scirpus palustris</i>                            |
|      | <i>Epilobium hirsutum</i> L.                                                 | Onagraceae    | <i>E. tomentosum</i>                                |
|      | <i>Equisetum ramosissimum</i> Desf.                                          | Equisetaceae  | <i>E. ramosum</i>                                   |
| Eqte | <i>Equisetum telmateia</i> Ehrh.                                             | Equisetaceae  | <i>E. maximum</i>                                   |
|      | <i>Eragrostis atrovirens</i> (Desf.) Trin.<br>var. <i>fontanesiana</i> Maire | Poaceae       |                                                     |
|      | <i>Eragrostis pilosa</i> (L.) P.B.                                           | Poaceae       |                                                     |
| Erar | <i>Erica arborea</i> L.                                                      | Ericaceae     |                                                     |
| Ersc | <i>Erica scoparia</i> L. subsp. <i>scoparia</i>                              | Ericaceae     |                                                     |
| Erbo | <i>Erodium botrys</i> (Cav.) Bertol.                                         | Geraniaceae   | <i>E. gasparrinii</i> , <i>Geranium botrys</i>      |
| Erci | <i>Erodium cicutarium</i> (L.) l'Her.                                        | Geraniaceae   |                                                     |
|      | <i>Eryngium pusillum</i> L.                                                  | Apiaceae      | <i>E. barrelieri</i>                                |
|      | <i>Eryngium tricuspdatum</i> L.                                              | Apiaceae      | <i>E. dichotomum</i>                                |
|      | <i>Eucalyptus camaldulensis</i> Dehnh.                                       | Myrtaceae     |                                                     |
|      | <i>Eucalyptus gomphocephala</i> DC.                                          | Myrtaceae     |                                                     |
| Eubi | <i>Euphorbia biumbellata</i> Poir.                                           | Euphorbiaceae |                                                     |
|      | <i>Euphorbia helioscopia</i> L.                                              | Euphorbiaceae |                                                     |
|      | <i>Euphorbia paralias</i> L.                                                 | Euphorbiaceae | <i>Tithymalus paralias</i>                          |
| Eupe | <i>Euphorbia peplis</i> L.                                                   | Euphorbiaceae | <i>Chamaesyce peplis</i>                            |
|      | <i>Euphorbia terracina</i> L.                                                | Euphorbiaceae |                                                     |
| Fegr | <i>Fedia graciliflora</i> Fischer & Meyer                                    | Valerianaceae |                                                     |
| Fica | <i>Ficus carica</i> L.                                                       | Moraceae      |                                                     |
| Fipy | <i>Filago pygmaea</i> L.                                                     | Asteraceae    | <i>Evax pygmaea</i>                                 |

| Code  | Espèce                                                                       | Famille          | Synonymes principaux                                              |
|-------|------------------------------------------------------------------------------|------------------|-------------------------------------------------------------------|
|       | <i>Fimbristylis squarrosa</i> (Poir.) Vahl.                                  | Cyperaceae       |                                                                   |
| Fral  | <i>Frangula alnus</i> Mill.                                                  | Rhamnaceae       | <i>F. dodonei</i> , <i>Rhamnus frangula</i>                       |
| Fran  | <i>Fraxinus angustifolia</i> Vahl.                                           | Oleaceae         | <i>F. oxyphylla</i> , <i>F. oxycarpa</i>                          |
|       | <i>Fuirena pubescens</i> (Poir.) Kunth.                                      | Cyperaceae       | <i>Carex pubescens</i> , <i>Scirpus pubescens</i>                 |
|       | <i>Fumaria capreolata</i> L.                                                 | Fumariaceae      | <i>F. preciosa</i> , <i>F. pallidiflora</i>                       |
|       | <i>Funaria hygrometrica</i> Hedw.                                            | Funariaceae      |                                                                   |
|       | <i>Galactites elegans</i> (All.) Soldano                                     | Asteraceae       | <i>G. tomentosa</i>                                               |
|       | <i>Galium palustre</i> L.                                                    | Rubiaceae        | <i>G. debile</i> , <i>G. elongatum</i>                            |
|       | subsp. <i>elongatum</i> (C.Presl) Lange                                      |                  |                                                                   |
|       | <i>Galium scabrum</i> L.                                                     | Rubiaceae        | <i>G. ellipticum</i>                                              |
| Gefe  | <i>Genista ferox</i> (Poir.)                                                 | Fabaceae         | <i>G. ferox</i> subsp. <i>typica</i>                              |
|       | <i>Geranium dissectum</i> L.                                                 | Geraniaceae      |                                                                   |
| Gemo  | <i>Geranium molle</i> L.                                                     | Geraniaceae      |                                                                   |
|       | <i>Geranium robertianum</i> L.                                               | Geraniaceae      |                                                                   |
|       | <i>Glaucium flavum</i> Crantz                                                | Papaveraceae     | <i>G. luteum</i> , <i>G. fulvum</i>                               |
| Glfu  | <i>Glyceria fluitans</i> (L.) R.Br.                                          | Poaceae          |                                                                   |
| Haha  | <i>Halimium halimifolium</i> (L.) Willk<br>subsp. <i>halimifolium</i> Guinea | Cistaceae        | <i>Cistus halimifolium</i>                                        |
| Heal  | <i>Hedera algeriensis</i> Hibberd                                            | Araliaceae       | <i>H. canariensis</i> , <i>H. helix</i> subsp. <i>canariensis</i> |
| Hecr  | <i>Helosciadium crassipes</i> W.D.J. Koch ex Rechb.                          | Apiaceae         | <i>Apium crassipes</i>                                            |
| Heno  | <i>Helosciadium nodiflorum</i> (L.) W.D.J. Koch                              | Apiaceae         | <i>Apium nodiflorum</i>                                           |
| Hola  | <i>Holcus lanatus</i> L.                                                     | Poaceae          |                                                                   |
|       | <i>Hordeum murinum</i> L. subsp. <i>leporinum</i> (Link) Arcang.             | Poaceae          | <i>H. leporinum</i>                                               |
| Hyra  | <i>Hyoseris radiata</i> L.                                                   | Asteraceae       | <i>H. lucida</i>                                                  |
| Hyaf  | <i>Hypericum afrum</i> Lam.                                                  | Hypericaceae     |                                                                   |
|       | <i>Hypericum androsaemum</i> L.                                              | Hypericaceae     | <i>Androsaemum officinale</i>                                     |
|       | <i>Hypericum perforatum</i> L.                                               | Hypericaceae     | <i>H. lineolatum</i>                                              |
|       | <i>Hypochaeris radicata</i> L.<br>var. <i>heterocarpa</i> Moris              | Asteraceae       |                                                                   |
|       | <i>Illecebrum verticillatum</i> L.                                           | Caryophyllaceae  |                                                                   |
|       | <i>Iris foetidissima</i> L.                                                  | Iridaceae        |                                                                   |
| Irps  | <i>Iris pseudacorus</i> L.                                                   | Iridaceae        |                                                                   |
|       | <i>Iris unguicularis</i> Poir.                                               | Iridaceae        | <i>I. stylosa</i>                                                 |
| Ishy  | <i>Isoetes histrix</i> Bory                                                  | Isoetaceae       |                                                                   |
| Isve  | <i>Isoetes velata</i> A.Braun                                                | Isoetaceae       |                                                                   |
|       | <i>Isolepis cernua</i> (Vahl.) Roemer & Schultes                             | Cyperaceae       | <i>Scirpus cernuus</i>                                            |
|       | <i>Isolepis pseudosetacea</i> (Daveau) Carv.-Vasc.                           | Cyperaceae       |                                                                   |
| Juac  | <i>Juncus acutus</i> L.                                                      | Juncaceae        |                                                                   |
|       | <i>Juncus articulatus</i> L.<br>subsp. <i>articulatus</i>                    | Juncaceae        | <i>J. lamprocarpus</i>                                            |
| Jubuf | <i>Juncus bufonius</i> L.                                                    | Juncaceae        | <i>J. bufonius</i> subsp. <i>eu-bufonius</i>                      |
| Jubul | <i>Juncus bulbosus</i> L.<br>subsp. <i>bulbosus</i>                          | Juncaceae        | <i>J. supinus</i>                                                 |
| Juca  | <i>Juncus capitatus</i> Weigel                                               | Juncaceae        |                                                                   |
| Juco  | <i>Juncus conglomeratus</i> L.                                               | Juncaceae        |                                                                   |
| Juef  | <i>Juncus effusus</i> L.                                                     | Juncaceae        |                                                                   |
| Juhe  | <i>Juncus heterophyllus</i> Dufour                                           | Juncaceae        |                                                                   |
|       | <i>Juncus maritimus</i> Lam.                                                 | Juncaceae        | <i>J. maritimus</i> var. <i>typicus</i>                           |
|       | <i>Juncus pygmaeus</i> Rich. ex Thuill.                                      | Juncaceae        | <i>J. mutabilis</i>                                               |
|       | <i>Juncus tenageia</i> Ehrh. ex L.f.                                         | Juncaceae        | <i>J. tenageia</i> subsp. <i>eu-tenageia</i>                      |
|       | <i>Juniperus oxycedrus</i> L. subsp. <i>macrocarpa</i> (Sm.) Ball            | Cupressaceae     | <i>J. macrocarpa</i>                                              |
|       | <i>Kickxia commutata</i> (Reichenb.) Fritsch                                 | Scrophulariaceae | <i>Linaria commutata</i> , <i>Linaria graeca</i>                  |
| Lavi  | <i>Lactuca viminea</i> (L.) J. & C.Presl                                     | Asteraceae       |                                                                   |
|       | <i>Lagurus ovatus</i> L.                                                     | Poaceae          |                                                                   |
|       | <i>Lamarckia aurea</i> (L.) Moench.                                          | Poaceae          | <i>Cynosurus aureus</i>                                           |
|       | <i>Lamium bifidum</i> Cyrillo                                                | Lamiaceae        |                                                                   |

| Code | Espèce                                                                        | Famille          | Synonymes principaux                                       |
|------|-------------------------------------------------------------------------------|------------------|------------------------------------------------------------|
|      | <i>Lamium flexuosum</i> Ten.                                                  | Lamiaceae        |                                                            |
|      | <i>Lamium purpureum</i> L.                                                    | Lamiaceae        | <i>L. bifidum</i> subsp. <i>albimontanum</i>               |
| Lano | <i>Laurus nobilis</i> L.                                                      | Lauraceae        |                                                            |
|      | <i>Lavandula stoechas</i> L.                                                  | Lamiaceae        |                                                            |
|      | <i>Lavatera cretica</i> L.                                                    | Malvaceae        |                                                            |
|      | <i>Lavatera olbia</i> L.                                                      | Malvaceae        | <i>L. hispida</i>                                          |
| Lehe | <i>Leersia hexandra</i> Sw.                                                   | Poaceae          | <i>L. oryzoides</i>                                        |
|      | <i>Legousia falcata</i> (Ten.) Fritsch                                        | Campanulaceae    | <i>Specularia falcata</i>                                  |
| Lemi | <i>Lemna minor</i> L.                                                         | Lemnaceae        | <i>L. vulgaris</i>                                         |
|      | <i>Linaria flava</i> (Poir.) Desf.                                            | Scrophulariaceae |                                                            |
|      | <i>Linaria pinifolia</i> (Poir.) Thell.                                       | Scrophulariaceae | <i>Linaria reticulata</i>                                  |
| Lire | <i>Linaria reflexa</i> (L.) Chaz.                                             | Scrophulariaceae | <i>Antirrhinum reflexum</i>                                |
|      | <i>Linum usitatissimum</i> L.                                                 | Linaceae         | <i>L. humile</i>                                           |
|      | <i>Logfia gallica</i> (L.) Coss. & Germ.                                      | Asteraceae       | <i>Filago gallica</i>                                      |
| Lomu | <i>Lolium multiflorum</i> Lam.                                                | Poaceae          | <i>L. italicum</i> , <i>L. gaudinii</i>                    |
|      | <i>Lotus corniculatus</i> L.<br>subsp. <i>preslii</i> (Ten.) P.Fourn.         | Fabaceae         | <i>L. corniculatus</i> subsp. <i>decumbens</i>             |
|      | <i>Lotus edulis</i> L.                                                        | Fabaceae         |                                                            |
|      | <i>Lotus hispidus</i> Desf. ex DC.                                            | Fabaceae         | <i>L. angustissimus</i> subsp. <i>hispidus</i>             |
| Lope | <i>Lotus pedunculatus</i> Cav.                                                | Fabaceae         | <i>L. decumbens</i> , <i>L. uliginosus</i>                 |
| Lupa | <i>Ludwigia palustris</i> (L.) Elliot                                         | Onagraceae       | <i>Isnardia palustris</i>                                  |
| Luan | <i>Lupinus angustifolius</i> L.                                               | Fabaceae         | <i>L. leucospermus</i>                                     |
|      | <i>Lupinus luteus</i> L.                                                      | Fabaceae         |                                                            |
|      | <i>Luzula forsteri</i> (Sm.) DC.                                              | Juncaceae        | <i>Juncus forsteri</i>                                     |
| Lyeu | <i>Lycopus europaeus</i> L.                                                   | Lamiaceae        |                                                            |
| Lyhy | <i>Lythrum hyssopifolia</i> L.                                                | Lythraceae       |                                                            |
| Lyju | <i>Lythrum junceum</i> Banks & Sol.                                           | Lythraceae       | <i>L. graefferi</i>                                        |
| Lysa | <i>Lythrum salicaria</i> L.                                                   | Lythraceae       |                                                            |
|      | <i>Malcomia ramosissima</i> (Desf.) Thell.                                    | Brassicaceae     | <i>M. parviflora</i> , <i>Hesperis ramosissima</i>         |
|      | <i>Medicago orbicularis</i> (L.) Bartal.                                      | Fabaceae         | <i>M. polymorpha</i> var. <i>orbicularis</i>               |
|      | <i>Melica minuta</i> L.<br>subsp. <i>major</i> (Parl.) Trab.                  | Poaceae          |                                                            |
|      | <i>Melilotus infestus</i> Guss.                                               | Fabaceae         | <i>M. rigidus</i>                                          |
| Meaq | <i>Mentha aquatica</i> L.                                                     | Lamiaceae        |                                                            |
| Mepu | <i>Mentha pulegium</i> L.                                                     | Lamiaceae        |                                                            |
|      | <i>Mentha suaveolens</i> Ehrh.<br>subsp. <i>suaveolens</i>                    | Lamiaceae        | <i>M. macrostachya</i> , <i>M. rotundifolia</i>            |
|      | <i>Mibora minima</i> (L.) Desv.                                               | Poaceae          | <i>Agrostis minima</i> , <i>M. verna</i>                   |
|      | <i>Mycelis muralis</i> (L.) Dumort.                                           | Asteraceae       | <i>Lactuca muralis</i> , <i>Prenanthes muralis</i>         |
|      | <i>Myosotis ramosissima</i> Rochel.                                           | Boraginaceae     | <i>M. hispida</i> , <i>M. collina</i>                      |
|      | <i>Myosotis sicula</i> (Guss).                                                | Boraginaceae     | <i>M. debilis</i> , <i>M. lingulata</i> var. <i>sicula</i> |
|      | <i>Myriophyllum alterniflorum</i> DC.                                         | Haloragidaceae   |                                                            |
| Myco | <i>Myrtus communis</i> L.                                                     | Myrtaceae        |                                                            |
|      | <i>Narcissus tazetta</i> L.                                                   | Amaryllidaceae   |                                                            |
| Naof | <i>Nasturtium officinale</i> R.Br.                                            | Brassicaceae     | <i>Rorripa nasturtium-aquatica</i>                         |
| Neol | <i>Nerium oleander</i> L.                                                     | Apocynaceae      |                                                            |
| Nyal | <i>Nymphaea alba</i> L.                                                       | Nymphaeaceae     |                                                            |
|      | <i>Oenanthe fistulosa</i> L.                                                  | Apiaceae         |                                                            |
|      | <i>Oenanthe globulosa</i> L.                                                  | Apiaceae         |                                                            |
| Oleu | <i>Olea europaea</i> L.<br>var. <i>sylvestris</i> (Mill.) Lehr                | Oleaceae         | <i>O. oleaster</i>                                         |
|      | <i>Ononis pubescens</i> L.                                                    | Fabaceae         |                                                            |
|      | <i>Ononis spinosa</i> L.<br>subsp. <i>maritima</i> (Dumort. ex Piré) P.Fourn. | Fabaceae         | <i>O. repens</i>                                           |
| Orpi | <i>Ornithopus pinnatus</i> (Mill) Druce                                       | Fabaceae         | <i>O. ebracteatus</i> , <i>O. exstipulatus</i>             |
|      | <i>Oryzopsis miliacea</i> (L.) Benth. & Hook.                                 | Poaceae          | <i>Piptatherum miliaceum</i>                               |

| Code | Espèce                                                                                  | Famille          | Synonymes principaux                                            |
|------|-----------------------------------------------------------------------------------------|------------------|-----------------------------------------------------------------|
| Osre | <i>Osmunda regalis</i> L.                                                               | Osmundaceae      |                                                                 |
|      | <i>Oxalis corniculata</i> L.                                                            | Oxalidaceae      | <i>O. repens</i>                                                |
|      | <i>Oxalis floribunda</i> Lehm.                                                          | Oxalidaceae      | <i>O. articulata</i>                                            |
| Oxpc | <i>Oxalis pes-caprae</i> L.                                                             | Oxalidaceae      | <i>O. cernua</i> , <i>O. pleniflora</i>                         |
| Pare | <i>Panicum repens</i> L.                                                                | Poaceae          |                                                                 |
| Paar | <i>Paronychia argentea</i> Lam.                                                         | Caryophyllaceae  | <i>P. mauritanica</i>                                           |
| Padi | <i>Paspalum distichum</i> L.                                                            | Poaceae          | <i>Digitaria paspalodes</i> , <i>P. paspalodes</i>              |
| Pehy | <i>Persicaria hydropiper</i> (L.) Spach                                                 | Polygonaceae     |                                                                 |
|      | <i>Persicaria lapathifolia</i> (L.) Gray                                                | Polygonaceae     | <i>Polygonum lapathifolium</i>                                  |
| Pesa | <i>Persicaria salicifolia</i> (Willd.) Assenov                                          | Polygonaceae     | <i>P. scabrum</i> , <i>Polygonum salicifolium</i>               |
|      | <i>Persicaria senegalensis</i> (Meisn.) Soj.                                            | Polygonaceae     | <i>Polygonum senegalense</i>                                    |
| Phla | <i>Phillyrea latifolia</i> L.                                                           | Oleaceae         | <i>P. angustifolia</i> subsp. <i>latifolia</i>                  |
| Phau | <i>Phragmites australis</i> (Cav.) Trin. ex Steud.                                      | Poaceae          | <i>P. communis</i>                                              |
|      | <i>Phytolacca americana</i> L.                                                          | Phytolaccaceae   | <i>P. decandra</i>                                              |
|      | <i>Pinus pinaster</i> Aiton                                                             | Pinaceae         | <i>P. maritima</i>                                              |
| Pile | <i>Pistacia lentiscus</i> L.                                                            | Anacardiaceae    |                                                                 |
|      | <i>Plagius fontanaseii</i> (Boiss. & Reut.) Vogt                                        | Asteraceae       | <i>Leucanthemum fontaneseii</i>                                 |
|      | <i>Plantago afra</i> L.                                                                 | Plantaginaceae   | <i>P. psyllium</i> , <i>P. parviflora</i>                       |
| Plco | <i>Plantago coronopus</i> L.<br>subsp. <i>humilis</i> (Guss.) Gamisans                  | Plantaginaceae   | <i>P. macrorrhiza</i>                                           |
|      | <i>Plantago crassifolia</i> Forssk.                                                     | Plantaginaceae   | <i>P. maritima</i> subsp. <i>crassifolia</i>                    |
| Plla | <i>Plantago lanceolata</i> L.                                                           | Plantaginaceae   | <i>P. dubia</i> , <i>P. capitata</i>                            |
|      | <i>Plantago major</i> L.                                                                | Plantaginaceae   | <i>P. minima</i>                                                |
|      | <i>Poa annua</i> L.                                                                     | Poaceae          | <i>P. annua</i> subsp. <i>typica</i>                            |
|      | <i>Poa trivialis</i> L.                                                                 | Poaceae          | <i>P. pratensis</i>                                             |
| Pote | <i>Polycarpon tetraphyllum</i> (L.) L.                                                  | Caryophyllaceae  |                                                                 |
| Poca | <i>Polypodium cambricum</i> L.                                                          | Polypodiaceae    | <i>P. vulgare</i> subsp. <i>serratum</i>                        |
|      | <i>Polypogon maritimus</i> Willd.<br>subsp. <i>subspathaceus</i> (Req.) Asch. & Graebn. | Poaceae          | <i>P. subspathaceus</i>                                         |
| Pomo | <i>Polypogon monspeliensis</i> (L.) Desf.                                               | Poaceae          | <i>Phalaris cristata</i>                                        |
| Povi | <i>Polypogon viridis</i> (Gouan) Breistr.                                               | Poaceae          | <i>Phalaris semiverticillata</i>                                |
|      | <i>Polystichum setiferum</i> (Forssk.) T.Moore ex Woyнар                                | Dryopteridaceae  | <i>Dryopteris aculeata</i>                                      |
| Poal | <i>Populus alba</i> L.                                                                  | Salicaceae       |                                                                 |
|      | <i>Populus nigra</i> L.                                                                 | Salicaceae       |                                                                 |
| Pono | <i>Potamogeton nodosus</i> Poir.                                                        | Potamogetonaceae | <i>P. fluitans</i>                                              |
|      | <i>Potamogeton trichoides</i> Cham. & Schl.                                             | Potamogetonaceae |                                                                 |
| Pore | <i>Potentilla reptans</i> L.                                                            | Rosaceae         |                                                                 |
|      | <i>Prospero autumnale</i> (L.) Speta                                                    | Hyacinthaceae    | <i>Scilla autumnalis</i>                                        |
|      | <i>Prunella vulgaris</i> L.                                                             | Lamiaceae        | <i>Brunella vulgaris</i>                                        |
| Prav | <i>Prunus avium</i> (L.) L.                                                             | Rosaceae         | <i>Cerasus avium</i>                                            |
| Ptaq | <i>Pteridium aquilinum</i> (L.) Kuhn                                                    | Dennstaedtiaceae | <i>Pteris aquilina</i>                                          |
|      | <i>Puccinellia distans</i> (Jacq.) Parl.                                                | Poaceae          | <i>Poa distans</i>                                              |
|      | <i>Pycnus flavescens</i> (L.) Rchb.                                                     | Cyperaceae       | <i>Cyperus flavescens</i>                                       |
| Quca | <i>Quercus canariensis</i> Willd.                                                       | Fagaceae         | <i>Q. faginea</i> , <i>Q. mirbeckii</i>                         |
| Quco | <i>Quercus coccifera</i> L. subsp. <i>pseudococcifera</i> (Desf.) Arcang.               | Fagaceae         | <i>Q. rivasmartinezii</i>                                       |
| Qusu | <i>Quercus suber</i> L.                                                                 | Fagaceae         | <i>Q. bivoniana</i> , <i>Q. occidentalis</i>                    |
| Raba | <i>Ranunculus baudotii</i> Godr.                                                        | Ranunculaceae    | <i>R. aquatilis</i> subsp. <i>baudotii</i> , <i>R. peltatus</i> |
| Rabu | <i>Ranunculus bulbosus</i> L.                                                           | Ranunculaceae    |                                                                 |
| Rafi | <i>Ranunculus ficaria</i> L.                                                            | Ranunculaceae    | <i>Ficaria verna</i>                                            |
| Rafl | <i>Ranunculus flammula</i> L.                                                           | Ranunculaceae    |                                                                 |
| Rahe | <i>Ranunculus hederaceus</i> L.                                                         | Ranunculaceae    | <i>R. homoephyllus</i> , <i>R. mauritanicus</i>                 |
|      | <i>Ranunculus macrophyllus</i> Desf.                                                    | Ranunculaceae    | <i>R. corsicus</i> , <i>R. procerus</i>                         |
|      | <i>Ranunculus muricatus</i> L.                                                          | Ranunculaceae    |                                                                 |
| Raop | <i>Ranunculus ophioglossifolius</i> Vill.                                               | Ranunculaceae    |                                                                 |

| Code | Espèce                                                                                                                                                                                                                                                                                                        | Famille                                                                                               | Synonymes principaux                                                                                           |
|------|---------------------------------------------------------------------------------------------------------------------------------------------------------------------------------------------------------------------------------------------------------------------------------------------------------------|-------------------------------------------------------------------------------------------------------|----------------------------------------------------------------------------------------------------------------|
| Rasa | <i>Ranunculus sardous</i> Crantz.                                                                                                                                                                                                                                                                             | Ranunculaceae                                                                                         |                                                                                                                |
| Rasc | <i>Ranunculus sceleratus</i> L.<br><i>Ranunculus trichophyllus</i> Chaix                                                                                                                                                                                                                                      | Ranunculaceae<br>Ranunculaceae                                                                        |                                                                                                                |
| Rara | <i>Raphanus raphanistrum</i> L.<br><i>Retama raetam</i> (Forssk.) Webb<br>subsp. <i>bovei</i> (Spach.) Talavera & Gibbs<br><i>Rhamnus alaternus</i> L.<br><i>Ricinus communis</i> L.<br><i>Romulea bulbocodium</i> (L.) Sebast. & Mauri<br><i>Rorripa amphibia</i> (L.) Besser<br><i>Rosa pouzinii</i> Tratt. | Brassicaceae<br>Fabaceae<br>Rhamnaceae<br>Euphorbiaceae<br>Iridaceae<br>Brassicaceae<br>Rosaceae      | <i>R. monosperma</i> subsp. <i>bovei</i><br><i>Ixia bulbocodium</i><br><i>R. canina</i> subsp. <i>pouzinii</i> |
| Rose | <i>Rosa sempervirens</i> L.<br><i>Rostraria hispida</i> (Savi) M.Dogan                                                                                                                                                                                                                                        | Rosaceae<br>Poaceae                                                                                   | <i>Bromus hispidus</i> , <i>Koeleria hispida</i>                                                               |
| Rupe | <i>Rubia peregrina</i> L.<br><i>Rubus incanescens</i> (DC.) Bert.                                                                                                                                                                                                                                             | Rubiaceae<br>Rosaceae                                                                                 | <i>R. numidicus</i>                                                                                            |
| Ruul | <i>Rubus ulmifolius</i> Schott.<br><i>Rumex bucephalophorus</i> L.<br><i>Rumex conglomeratus</i> Murray                                                                                                                                                                                                       | Rosaceae<br>Polygonaceae<br>Polygonaceae                                                              | <i>R. atlanticus</i> , <i>R. discolor</i>                                                                      |
| Rupu | <i>Rumex pulcher</i> L.                                                                                                                                                                                                                                                                                       | Polygonaceae                                                                                          |                                                                                                                |
| Ruhy | <i>Ruscus hypophyllum</i> L.                                                                                                                                                                                                                                                                                  | Ruscaceae                                                                                             |                                                                                                                |
| Saal | <i>Salix alba</i> L.                                                                                                                                                                                                                                                                                          | Salicaceae                                                                                            |                                                                                                                |
| Saat | <i>Salix atrocinerea</i> Brot.                                                                                                                                                                                                                                                                                | Salicaceae                                                                                            | <i>S. acuminata</i> , <i>S. cinerea</i>                                                                        |
| Sape | <i>Salix pedicellata</i> Desf.<br><i>Salvinia natans</i> (L.) All.<br><i>Sambucus ebulus</i> L.<br><i>Sanguisorba minor</i> Scop.<br><i>Schenkia spicata</i> (L.) Mansion                                                                                                                                     | Salicaceae<br>Salviniaceae<br>Caprifoliaceae<br>Rosaceae<br>Gentianaceae                              | <i>S. mauritanica</i><br><i>Centaurium spicatum</i>                                                            |
| Scla | <i>Schoenoplectus lacustris</i> (L.) Palla<br><i>Scirpoides holoschoenus</i> (L.) Soják<br>subsp. <i>holoschoenus</i><br><i>Scirpus inclinatus</i> (Del.) Asch et Sw.                                                                                                                                         | Cyperaceae<br>Cyperaceae<br>Cyperaceae                                                                | <i>Scirpus lacustris</i><br><i>Scirpus holoschoenus</i>                                                        |
| Schi | <i>Scolymus hispanicus</i> L.<br><i>Scorpiurus vermiculatus</i> L.                                                                                                                                                                                                                                            | Asteraceae<br>Fabaceae                                                                                |                                                                                                                |
| Scau | <i>Scrophularia auriculata</i> Loefl. ex L.                                                                                                                                                                                                                                                                   | Scrophulariaceae                                                                                      | <i>S. aquatica</i> subsp. <i>auriculata</i>                                                                    |
| Scsa | <i>Scrophularia sambucifolia</i> L. (Poir.)<br><i>Scrophularia tenuipes</i> Coss. & Dur.<br><i>Sedum album</i> L.<br><i>Sedum caeruleum</i> L.<br><i>Selaginella denticulata</i> (L.) Spring.<br><i>Senecio jacobaea</i> L.                                                                                   | Scrophulariaceae<br>Scrophulariaceae<br>Crassulaceae<br>Crassulaceae<br>Selaginellaceae<br>Asteraceae | <i>S. heptapetalum</i><br><i>Lycopodium denticulatum</i><br><i>S. erraticus</i>                                |
| Sele | <i>Senecio leucanthemifolius</i> Poir.<br><i>Senecio vulgaris</i> L.                                                                                                                                                                                                                                          | Asteraceae<br>Asteraceae                                                                              |                                                                                                                |
| Shar | <i>Sherardia arvensis</i> L.<br><i>Sideritis romana</i> L.<br>subsp. <i>numidica</i> Batt.<br><i>Silene coelirosa</i> (L.) Godr.                                                                                                                                                                              | Rubiaceae<br>Lamiaceae<br>Caryophyllaceae                                                             | <i>Eudianthe coelirosa</i>                                                                                     |
| Sico | <i>Silene colorata</i> Poir.                                                                                                                                                                                                                                                                                  | Caryophyllaceae                                                                                       |                                                                                                                |
| Siga | <i>Silene gallica</i> L.<br><i>Silene vulgaris</i> (Moench) Garcke.<br><i>Silybum marianum</i> (L.) Gaertn.                                                                                                                                                                                                   | Caryophyllaceae<br>Caryophyllaceae<br>Asteraceae                                                      | <i>Cucubalus sylvestris</i><br><i>S. cucubalus</i><br><i>Carduus marianus</i>                                  |
| Siar | <i>Sinapis arvensis</i> L.<br><i>Sinapis pubescens</i> L.<br>subsp. <i>eu-pubescens</i> Maire & Weiller                                                                                                                                                                                                       | Brassicaceae<br>Brassicaceae                                                                          |                                                                                                                |
| Smas | <i>Smilax aspera</i> L.                                                                                                                                                                                                                                                                                       | Smilacaceae                                                                                           |                                                                                                                |
| Sodu | <i>Solanum dulcamara</i> L.                                                                                                                                                                                                                                                                                   | Solanaceae                                                                                            |                                                                                                                |

| Code  | Espèce                                                | Famille          | Synonymes principaux                                  |
|-------|-------------------------------------------------------|------------------|-------------------------------------------------------|
|       | <i>Solanum linnaeanum</i> Hepper & Jaeger             | Solanaceae       | <i>S. sodomaeum</i>                                   |
|       | <i>Solanum nigrum</i> L.                              | Solanaceae       |                                                       |
| Sobi  | <i>Solenopsis bicolor</i> (Batt.) Greuter & Burdet    | Campanulaceae    | <i>Laurentia bicolor</i>                              |
|       | <i>Sonchus asper</i> (L.) Hill.                       | Asteraceae       |                                                       |
|       | <i>Sonchus oleraceus</i> L.                           | Asteraceae       | <i>S. ciliatus</i> , <i>S. lacerus</i>                |
| Sper  | <i>Sparganium erectum</i> L.                          | Sparganiaceae    |                                                       |
|       | subsp. <i>polyedrum</i> (Asch. & Gr.) Shinz. & Thell. |                  |                                                       |
| Spar  | <i>Spergula arvensis</i> L.                           | Caryophyllaceae  |                                                       |
| Spfa  | <i>Spergula fallax</i> (Lowe) E.H.L.Krause            | Caryophyllaceae  | <i>Spergularia fallax</i> , <i>S. flaccida</i>        |
|       | <i>Spergularia bocconi</i> (Sheele) Asch. & Graebn.   | Caryophyllaceae  | <i>Alsine bocconi</i> , <i>Spergula jallui</i>        |
|       | <i>Sphagnum auriculatum</i> Schimp.                   | Sphagnaceae      | <i>S. denticulatum</i>                                |
| Star  | <i>Stachys arvensis</i> (L.) L.                       | Lamiaceae        | <i>Glechoma arvensis</i>                              |
|       | <i>Stachys marrubifolia</i> Viv.                      | Lamiaceae        |                                                       |
|       | <i>Stellaria media</i> (L.) Vill                      | Caryophyllaceae  |                                                       |
|       | <i>Tamarix gallica</i> L.                             | Tamaricaceae     | <i>T. anglica</i>                                     |
| Taco  | <i>Tamus communis</i> L.                              | Dioscoreaceae    |                                                       |
|       | <i>Taxodium distichum</i> (L.) Rich.                  | Taxodiaceae      |                                                       |
|       | <i>Teline monspessulana</i> (L.) Koch.                | Fabaceae         | <i>Genista candicans</i>                              |
|       | <i>Tetragonolobus biflorus</i> (Desr.) DC.            | Fabaceae         | <i>Lotus biflorus</i> Desr.                           |
| Thin  | <i>Thelypteris interrupta</i> (Willd.) Iwatsuki       | Dryopteridaceae  | <i>Dryopteris gongyloides</i> subsp. <i>propinqua</i> |
| Toba  | <i>Tolpis barbata</i> (L.) Gaertn.                    | Asteraceae       |                                                       |
|       | <i>Torilis arvensis</i> (Huds.) Link                  | Apiaceae         | <i>T. neglecta</i>                                    |
|       | subsp. <i>neglecta</i> Thell.                         |                  |                                                       |
|       | <i>Torilis nodosa</i> (L.) Gaertn.                    | Apiaceae         | <i>Tordylium nodosum</i>                              |
|       | <i>Trifolium angustifolium</i> L.                     | Fabaceae         |                                                       |
|       | <i>Trifolium arvense</i> L.                           | Fabaceae         |                                                       |
| Trca  | <i>Trifolium campestre</i> Schreb.                    | Fabaceae         |                                                       |
|       | <i>Trifolium filiforme</i> L.                         | Fabaceae         | <i>T. micranthum</i>                                  |
|       | <i>Trifolium pratense</i> L.                          | Fabaceae         |                                                       |
|       | <i>Trifolium repens</i> L.                            | Fabaceae         |                                                       |
| Trres | <i>Trifolium resupinatum</i> L.                       | Fabaceae         |                                                       |
|       | <i>Trifolium squarrosum</i> L.                        | Fabaceae         | <i>T. panormitanum</i>                                |
|       | <i>Trifolium subterraneum</i> L.                      | Fabaceae         |                                                       |
| Tydo  | <i>Typha domingensis</i> (Pers.) Poir. ex Steud.      | Thyphaceae       | <i>T. angustifolia</i> , <i>T. australis</i>          |
| Ulmi  | <i>Ulmus minor</i> Mill.                              | Ulmaceae         | <i>U. campestris</i> , <i>U. procera</i>              |
|       | subsp. <i>minor</i>                                   |                  |                                                       |
| Umru  | <i>Umbilicus rupestris</i> (Salisb.) Dandy            | Crassulaceae     | <i>Cotyledon umbilicus-veneris</i>                    |
| Urdi  | <i>Urtica dioica</i> L.                               | Urticaceae       |                                                       |
|       | <i>Urtica membranacea</i> Poir.                       | Urticaceae       |                                                       |
|       | <i>Urtica pilulifera</i> L.                           | Urticaceae       | <i>U. caudata</i> , <i>U. dubia</i>                   |
|       | <i>Utricularia gibba</i> L.                           | Lentibulariaceae | <i>U. exoleta</i>                                     |
| Utvu  | <i>Utricularia vulgaris</i> L.                        | Lentibulariaceae |                                                       |
| Vesi  | <i>Verbascum sinuatum</i> L.                          | Scrophulariaceae |                                                       |
| Veof  | <i>Verbena officinalis</i> L.                         | Verbenaceae      |                                                       |
| Veag  | <i>Veronica agrestis</i> L.                           | Scrophulariaceae |                                                       |
| Vean  | <i>Veronica anagallis-aquatica</i> L.                 | Scrophulariaceae |                                                       |
|       | subsp. <i>aquatica</i> (Bernh.) Maire                 |                  |                                                       |
| Viti  | <i>Viburnum tinus</i> L.                              | Caprifoliaceae   |                                                       |
|       | <i>Vicia altissima</i> Desf.                          | Fabaceae         | <i>V. polysperma</i>                                  |
|       | <i>Vicia hirsuta</i> (L.) Gray.                       | Fabaceae         | <i>Hervum hirsutum</i>                                |
| Vina  | <i>Vicia narbonensis</i> L.                           | Fabaceae         |                                                       |
| Visa  | <i>Vicia sativa</i> L.                                | Fabaceae         |                                                       |
|       | <i>Vicia sativa</i> L.                                | Fabaceae         | <i>V. angustifolia</i>                                |
|       | subsp. <i>nigra</i> (L.) Ehrh.                        |                  |                                                       |
|       | <i>Viola alba</i> Besser                              | Violaceae        | <i>V. denhardtii</i> , <i>V. thessala</i>             |
|       | subsp. <i>denhardtii</i> (Ten.) W.Becker              |                  |                                                       |
|       | <i>Vitex agnus-castus</i> L.                          | Verbenaceae      |                                                       |



| <b>Code</b> | <b>Espèce</b>                                                                                                                                                | <b>Famille</b>                              | <b>Synonymes principaux</b> |
|-------------|--------------------------------------------------------------------------------------------------------------------------------------------------------------|---------------------------------------------|-----------------------------|
| Vivi        | <i>Vitis vinifera</i> L.<br>subsp. <i>sylvestris</i> (C.C.Gmel.) Berger & Hegi<br><i>Wolffia arrhiza</i> (L.) Horkel ex Wimm.<br><i>Xanthium spinosum</i> L. | Vitaceae<br><br>Lemnaceae<br><br>Asteraceae | <i>V. sylvestris</i>        |
